# Supplementary material for: Arrhenius parameters for the OH-initiated degradation of methyl crotonate, methyl-3,3-dimethyl acrylate, (E)-ethyl tiglate and methyl-3-butenoate over the temperature range of 288–314 K
Source: Royal Society of Chemistry journal article supplement (doi:10.1039/c6ra10279d), 2016-01-01

Supplementary Information for

**Arrhenius parameters for the OH-initiated degradation of methyl crotonate, methyl-3,3-dimethyl acrylate, (*E*)-ethyl tiglate and methyl-3-butenate over the temperature range of 288-314 K**

Juan P. Colomer<sup>a</sup>, María B. Blanco<sup>a</sup>, Alicia B. Peñéñory<sup>a</sup>, Ian Barnes<sup>b</sup>, Peter Wiesen<sup>b</sup> and Mariano A. Teruel<sup>b\*</sup>

<sup>a</sup>. *Instituto de Investigaciones en Físicoquímica de Córdoba (I.N.F.I.Q.C.), CONICET. Facultad de Ciencias Químicas, Universidad Nacional de Córdoba. Ciudad Universitaria, 5000 Córdoba.*

<sup>b</sup>. *Bergische Universität Wuppertal, Fakultät für Mathematik und Naturwissenschaften, Physikalische & Theoretische Chemie, 42119 Wuppertal, Germany.*

**Figure S1:** IR spectrum of methyl crotonate

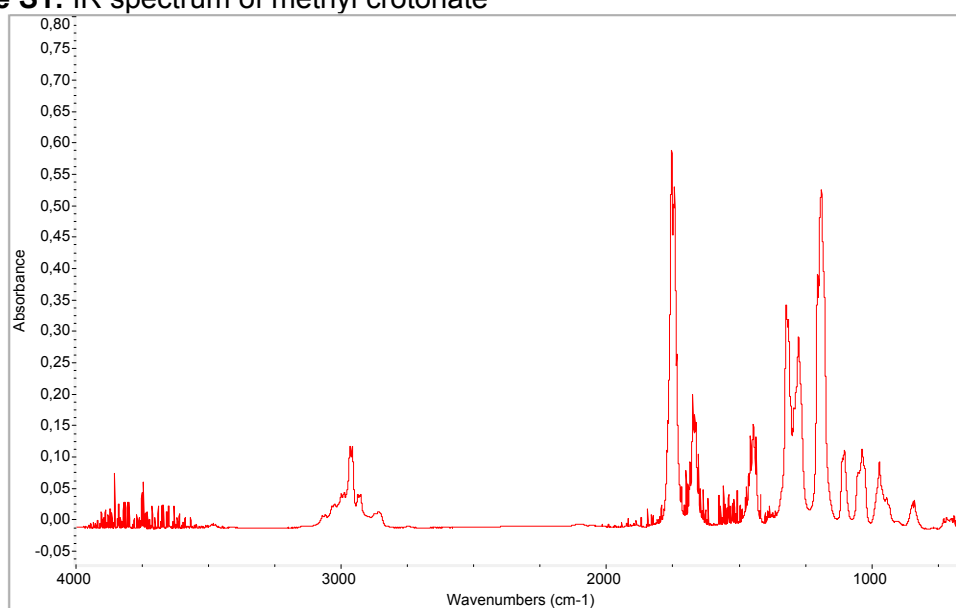

**Figure S2:** IR spectra of the reactants methyl crotonate, 1-butene, methyl nitrite and NO before photolysis

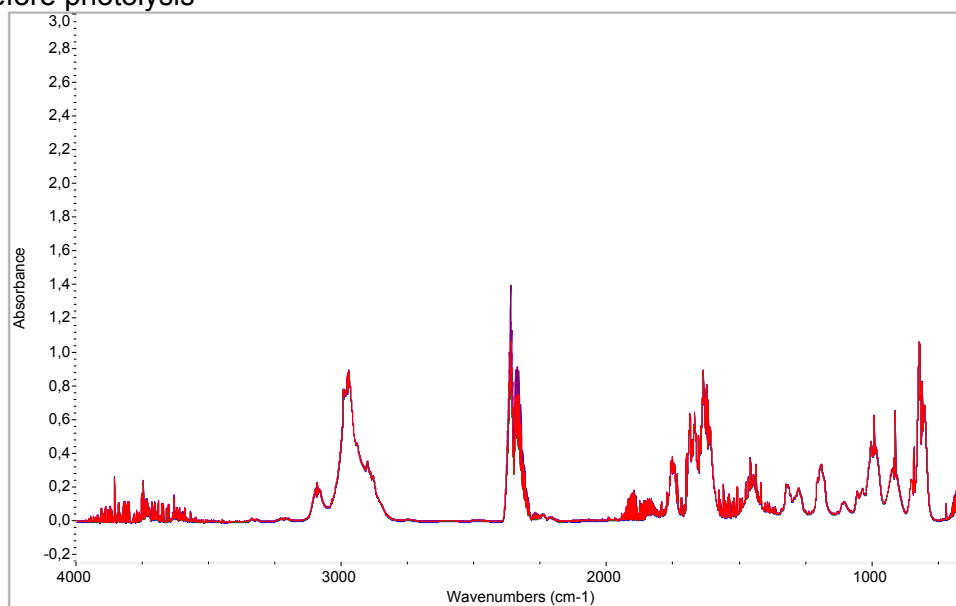

**Figure S3:** IR spectra of the reactants methyl crotonate, 1-butene, methyl nitrite and NO photolyzed at different times.

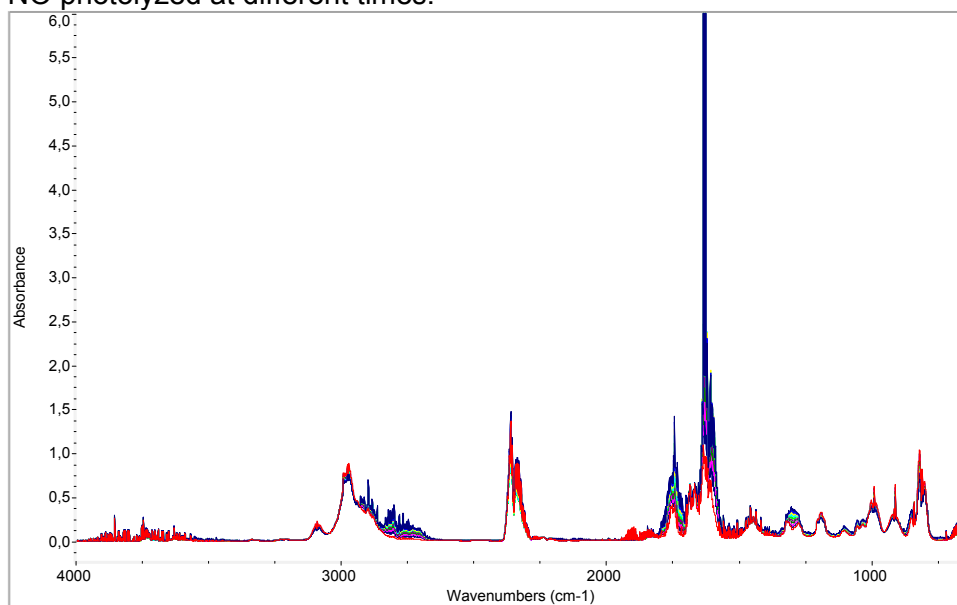

**Figure S4:** IR spectrum of methyl-3,3-dimethyl acrylate

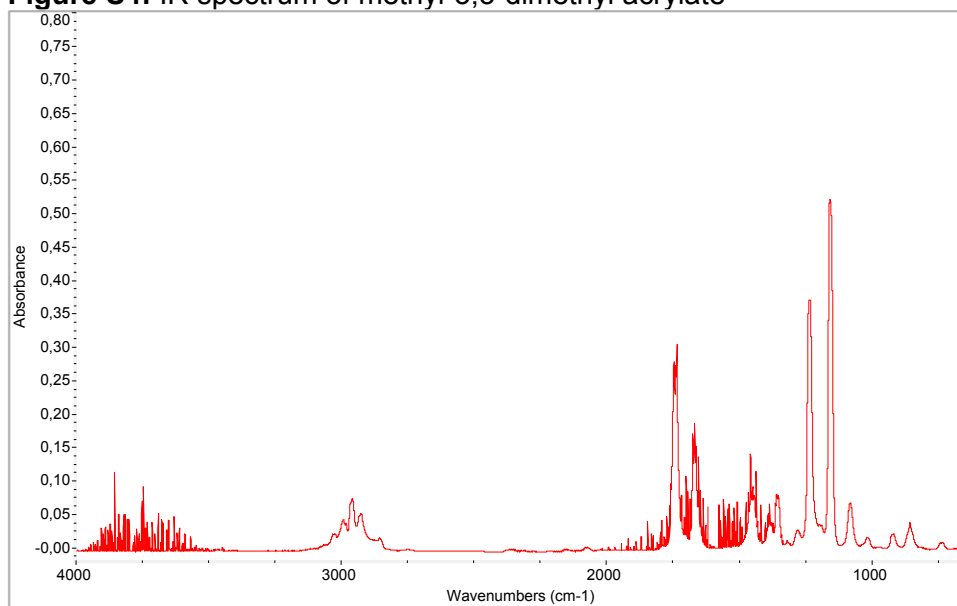

**Figure S5:** IR spectra of the reactants methyl-3,3-dimethyl acrylate, 1-butene, methyl nitrite and NO before photolysis

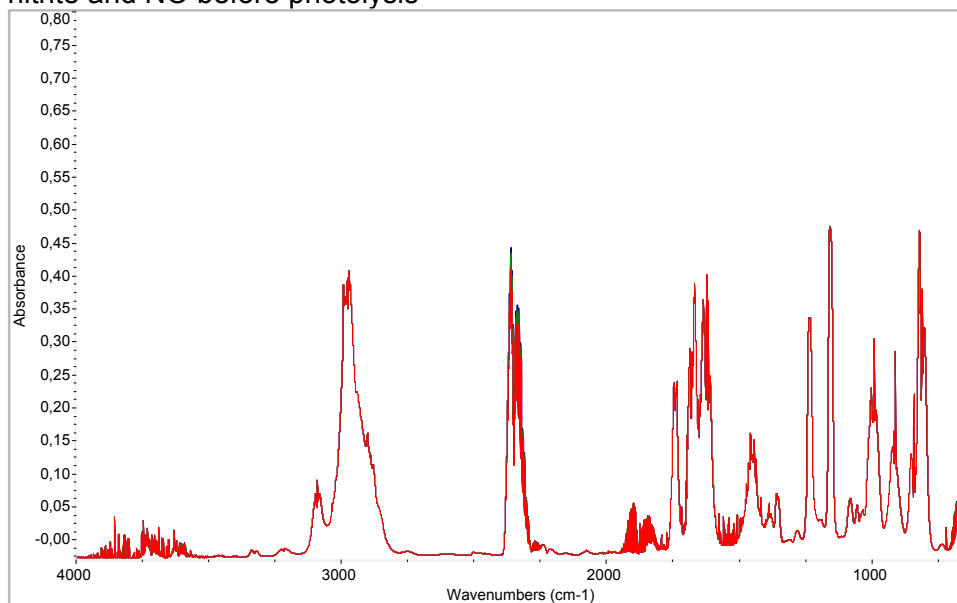

**Figure S6:** IR spectra of the reactants methyl-3,3-dimethyl acrylate, 1-butene, methyl nitrite and NO photolyzed at different times.

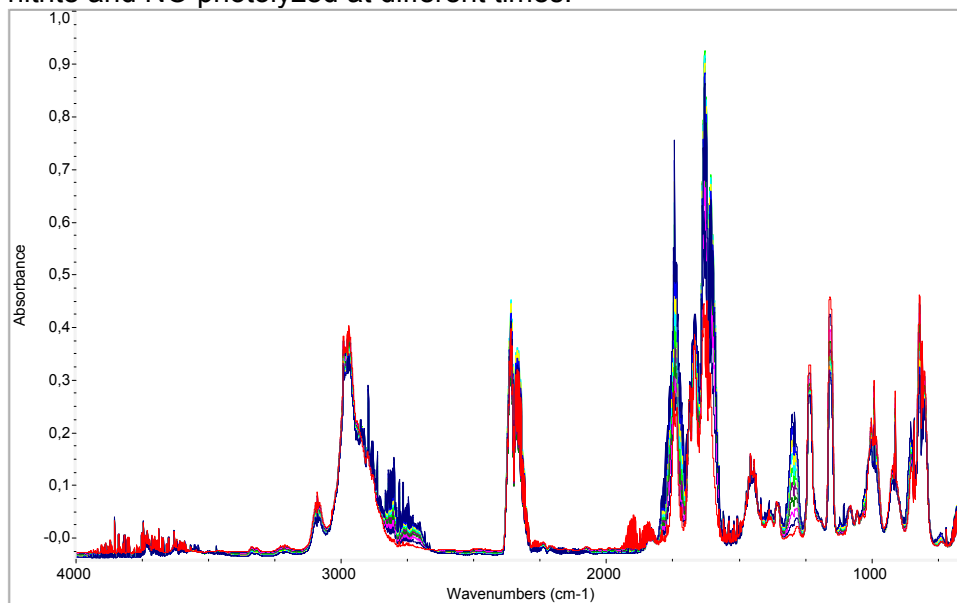

**Figure S7:** IR spectrum of (*E*)-ethyl tiglate

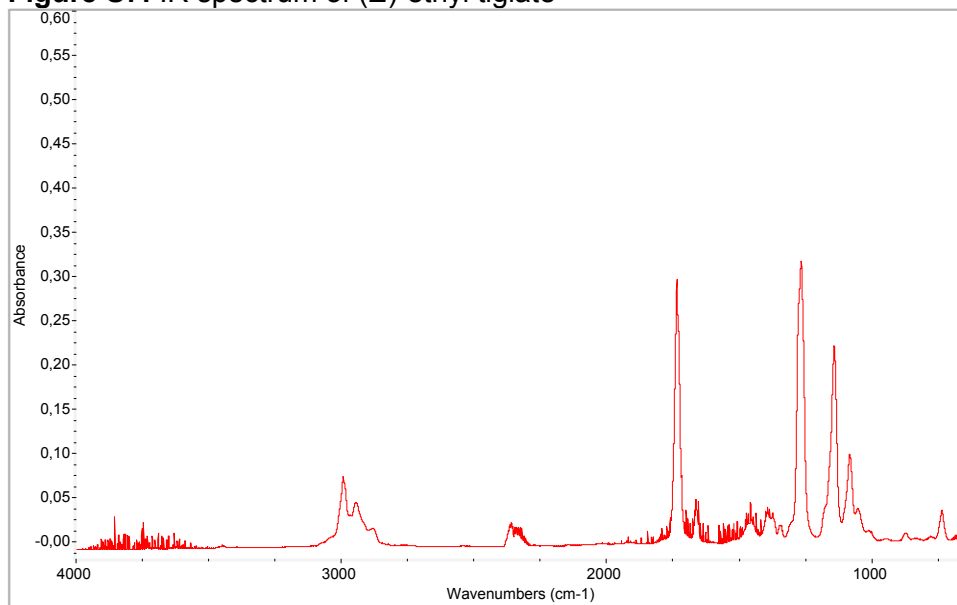

**Figure S8:** IR spectra of the reactants (*E*)-ethyl tiglate, 1-butene, methyl nitrite and NO before photolysis

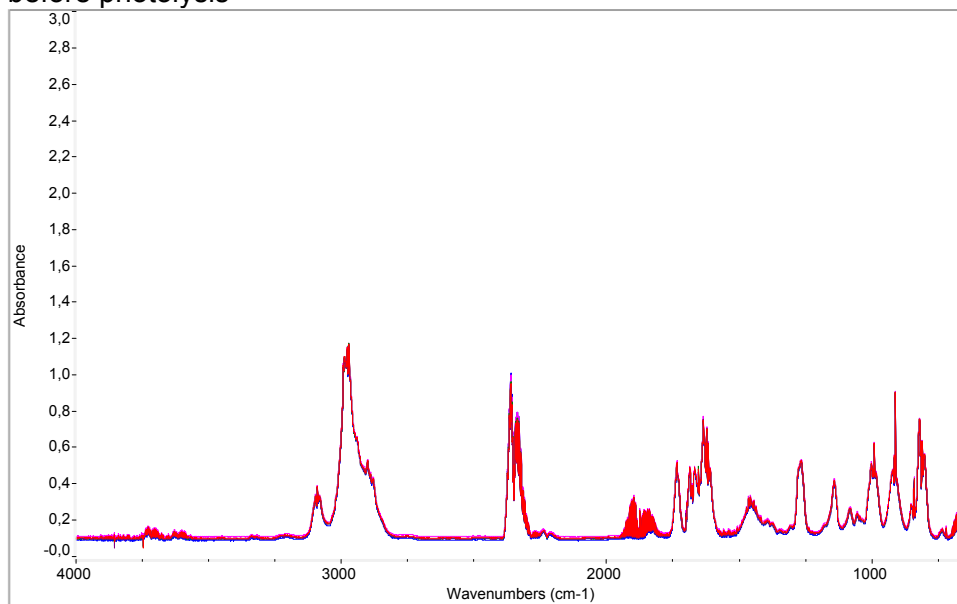

**Figure S9:** IR spectra of the reactants (*E*)-ethyl tiglate, 1-butene, methyl nitrite and NO photolyzed at different times.

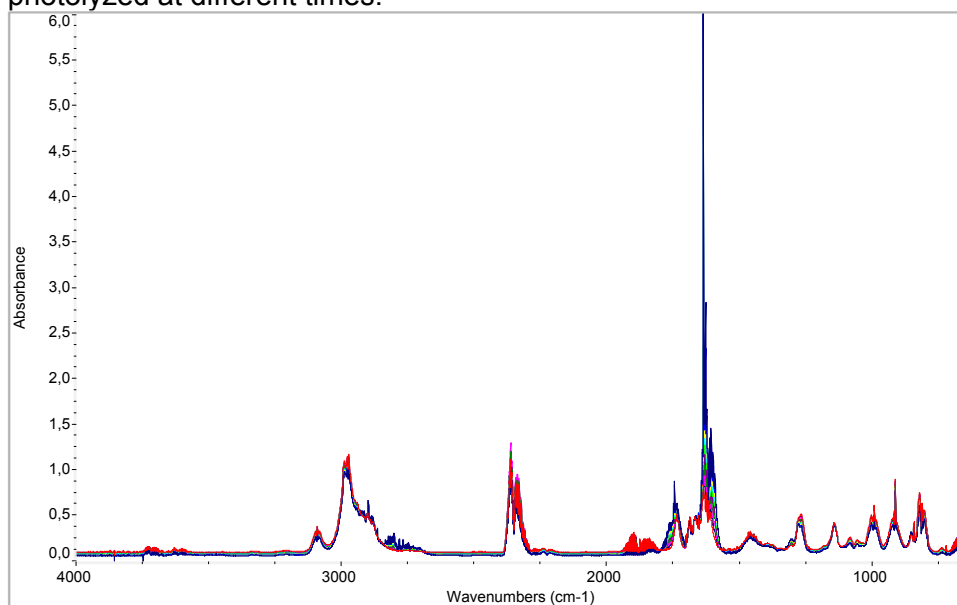

**Figure S10:** IR spectrum of methyl-3-butenolate

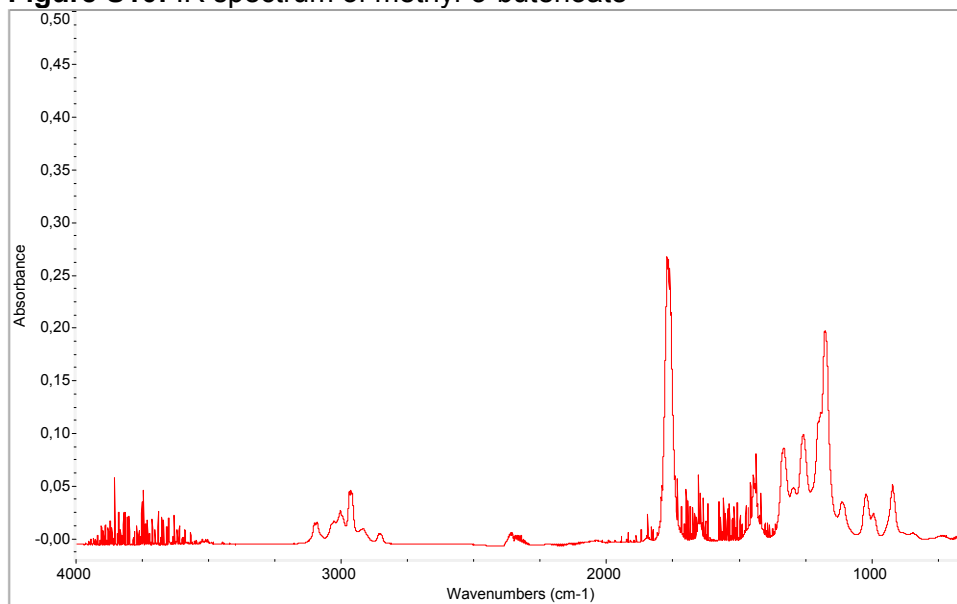

**Figure S11:** IR spectra of the reactants methyl-3-butenolate, 1-butene, methyl nitrite and NO before photolysis

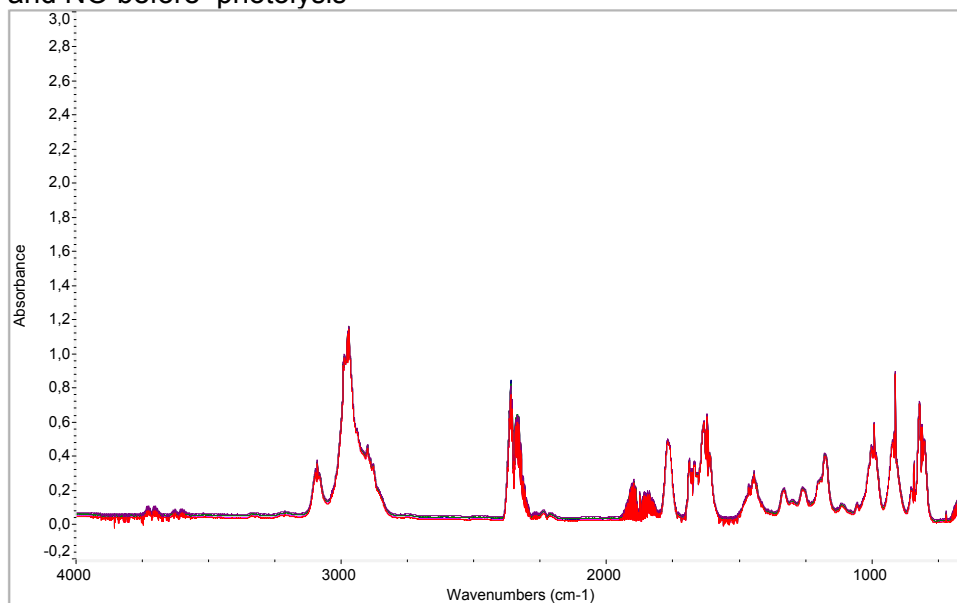

**Figure S12:** IR spectra of the reactants methyl-3-butenolate, 1-butene, methyl nitrite and NO photolyzed at different times.

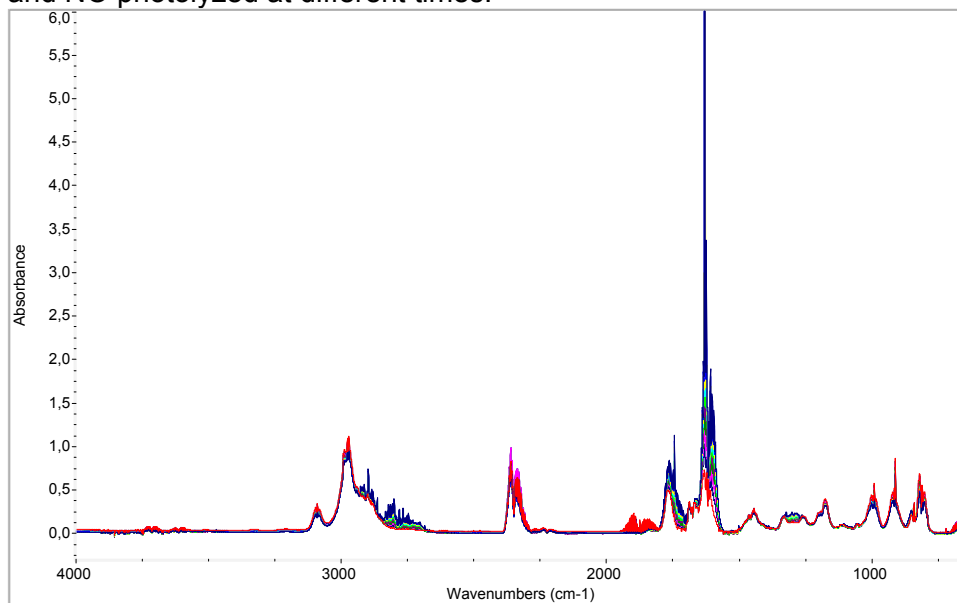

Supplement: c6ra10279d1.pdf [file c6ra10279d1.pdf]
